1

2

**Aging-related iron deposit prevents the benefits of HRT from late**

3

**postmenopausal atherosclerosis**

4

**Tianze Xu<sup>1\*</sup>, Jing Cai<sup>1\*</sup>, Lei Wang<sup>1</sup>, Li Xu<sup>2</sup>, Hongting Zhao<sup>2</sup>, Fudi Wang<sup>3</sup>, Esther**

5

**Meyron-Holtz<sup>4</sup>, Fanis Missirlis<sup>5</sup>, Tong Qiao<sup>1#</sup>, Kuanyu Li<sup>1,2#</sup>**

6

7

<sup>1</sup>State Key Laboratory of Pharmaceutical Biotechnology, Department of Vascular

8

Surgery, The Affiliated Drum Tower Hospital of Nanjing University Medical School,

9

Nanjing, 210008, P. R. China

10

<sup>2</sup>Jiangsu Key Laboratory of Molecular Medicine, Medical School of Nanjing

11

University, Nanjing, 210093, P. R. China

12

<sup>3</sup>Department of Nutrition, School of Public Health, School of Medicine, Zhejiang

13

University, Hangzhou, P. R. China

14

<sup>4</sup>Faculty of Biotechnology and Food Engineering, Technion Israel Institute of

15

Technology, Haifa, Israel

16

<sup>5</sup>Department of Physiology, Biophysics and Neuroscience, Cinvestav, Mexico City,

17

Mexico

18

19

\*Tianze Xu and Jing Cai contributed equally to this work

20

21

22

<sup>#</sup>Corresponding authors: Dr. Kuanyu Li, Jiangsu Key Laboratory of Molecular

23

Medicine, Medical School of Nanjing University, Nanjing, 210093, P. R. China.

24

Email: [likuanyu@nju.edu.cn](mailto:likuanyu@nju.edu.cn); Dr. Tong Qiao. Email: [qiaotong@nju.edu.cn](mailto:qiaotong@nju.edu.cn)

25

26

**Running Title: Iron reverses HRT effects on AS**

27

28 **Abstract**

29 Postmenopausal atherosclerosis has been attributed to estrogen deficiency. The  
30 beneficial effect of hormone replacement therapy (HRT), however, is lost in late  
31 postmenopausal women with atherogenesis. We asked whether aging-related iron  
32 accumulation affects estrogen receptor  $\alpha$  (ER $\alpha$ ) expression explaining HRT inefficacy.  
33 A negative correlation between aging-related systemic iron deposition and ER $\alpha$   
34 expression in postmenopausal AS patients was established. In an ovariectomized  
35 ApoE<sup>-/-</sup> mouse model, estradiol treatment had contrasting effects on ER $\alpha$  expression  
36 in early versus late postmenopausal mice. ER $\alpha$  expression was inhibited by iron  
37 treatment in cell culture and iron-overloaded mice. Combined treatment with estradiol  
38 and iron further decreased ER $\alpha$  expression, mediated by iron-regulated E3 ligase  
39 Mdm2. In line with these observations, cellular cholesterol efflux was reduced and  
40 endothelial homeostasis was disrupted and, consequently, atherosclerosis was  
41 aggravated. Accordingly, systemic iron chelation attenuated estradiol-triggered  
42 progressive atherosclerosis in late postmenopausal mice. Thus, iron and estradiol  
43 together downregulate ER $\alpha$  through Mdm2-mediated proteolysis, explaining failures  
44 of HRT in late postmenopausal subjects with aging-related iron accumulation. HRT is  
45 recommended immediately after menopause along with appropriate iron chelation to  
46 protect from atherosclerosis.

47 **Keywords:** Atherosclerosis, iron metabolism, post menopause, estrogen receptor  $\alpha$ ,  
48 hormone replacement therapy

49

## 50 **1. Introduction**

51 Atherosclerosis (AS) is the leading cause of cardiovascular disease-associated  
52 death worldwide (Moss *et al*, 2019). It has been well recognized that postmenopausal  
53 women confront an increasing risk of AS owing to estrogen deficiency and  
54 disturbance of the estrogen receptor (ER) regulatory network (Moss *et al.*, 2019).  
55 Nevertheless, the therapeutic effect of hormone replacement therapy (HRT) remains  
56 controversial. Women's Health Initiative and the Heart and Estrogen/Progestin  
57 Replacement Study reported that the atheroprotective effect of HRT in the late  
58 postmenopausal women (commonly ages over 65) is lost or even worsened (Hlatky *et*  
59 *al*, 2002; Rocca *et al*, 2014; Rossouw *et al*, 2002). The underlying mechanism may be  
60 triggered by aging, which reduces the protection afforded by estrogen, particularly  
61 estradiol (E<sub>2</sub>).

62 In general, the atheroprotective effect of estrogen is attributed to its interaction  
63 with estrogen receptor  $\alpha$  (ER $\alpha$ ), which participates in foam cell formation and  
64 vascular remodeling (Murphy, 2011). ER $\alpha$  deletion is reported to induce adiposity and  
65 increase atherosclerotic lesion size since the promoters of lipid metabolism-related  
66 genes, such as *Tgm2*, *ApoE*, and *Abca1*, contain ER $\alpha$  binding sites (Ribas *et al*, 2011).  
67 In addition, estrogen binds to ER $\alpha$  tethered to the plasma membrane, which can  
68 stimulate vasodilatation via an endothelial nitric oxide synthase (eNOS)-dependent  
69 pathway (Gavin *et al*, 2009; Teoh *et al*, 2020). Moreover, VEGF promotes  
70 angiogenesis and is transcriptionally regulated by the E<sub>2</sub>-ER $\alpha$  complex (Gu *et al*,  
71 2018). ER $\alpha$  expression decreases after menopause (Gavin *et al.*, 2009; Zhang *et al*,  
72 2019), suggesting the critical role of ER $\alpha$  in blood vessel function in healthy pre- and  
73 postmenopausal women. Despite the above, few studies have focused on the  
74 regulation of ER $\alpha$  in postmenopausal women on HRT.

75 Upon binding, estrogen functions as an ER $\alpha$  activator (Lung *et al*, 2020) and  
76 initiates ER $\alpha$  dimerization and translocation into the nucleus. Estrogen treatment *in*  
77 *vitro* leads to a marked increase in *Esr1* (gene that encodes ER $\alpha$ ) mRNA through the  
78 binding of the E<sub>2</sub>-ER $\alpha$  complex to estrogen-responsive elements (EREs) in the  
79 promoter region of *Esr1* (Pinzone *et al*, 2004). Estrogen binding to ER $\alpha$  also rapidly

80 stimulates ubiquitination and proteasomal degradation of ER $\alpha$  (Pinzone *et al.*, 2004).  
81 Ubiquitination-dependent ER $\alpha$  cycling on and off the ERE promoter sites to activate  
82 or prevent target gene transcription depends on the presence of estrogen at an  
83 adequate concentration (Zhou & Slingerland, 2014). Ubiquitin ligases that have been  
84 implicated in ER $\alpha$  regulation include BRCA1, MDM2, SKP1–CUL1–F-box S-phase  
85 kinase-associated protein 2 (SCF<sup>SKP2</sup>), and E6-associated protein (E6AP), all of which  
86 promote estrogen-induced transcriptional activity with cell-type selectivity (Zhou &  
87 Slingerland, 2014). Of these, MDM2 is a single-subunit RING finger E3 protein,  
88 which does not always inversely correlate with ER $\alpha$  levels in cancer cells (Duong *et al.*  
89 *al.*, 2007). The relationship between MDM2 and ER $\alpha$  in other contexts and cell types  
90 remains elusive.

91 Estrogen also regulates systemic iron homeostasis through hepcidin, an  
92 antimicrobial peptide of 25 amino acids that mediates endocytosis and degradation of  
93 the ferrous iron exporter ferroportin 1 (Fpn1) (Nemeth *et al.*, 2004). The dimeric E<sub>2</sub>-  
94 ER $\alpha$  complex binds to an ERE site within the promoter of the hepcidin gene (*Hamp*)  
95 to inhibit its expression (Hou *et al.*, 2012). Hence, E<sub>2</sub> elevates circulating iron to  
96 compensate for blood loss during menstruation (Badenhorst *et al.*, 2021). However, E<sub>2</sub>  
97 declines by over 90% after menopause, while systemic iron content increases slowly  
98 by steady iron uptake over the years. Serum ferritin in postmenopausal women  
99 increased by 2-3 times compared with premenopausal women (Huang *et al.*, 2013). We  
100 and others have previously reported that iron overload is a risk factor for  
101 atherosclerosis (Cai *et al.*, 2020; Vinchi *et al.*, 2020). Our study relied on using the  
102 proatherogenic *ApoE*<sup>-/-</sup> mouse model, which we can manipulate genetically to cause  
103 iron overload (Cai *et al.*, 2020). We aimed to investigate the impact of aging-related  
104 iron accumulation on the therapeutic effect of HRT on AS and explore the underlying  
105 mechanisms. First, we corroborated on a new cohort of postmenopausal AS patients  
106 that a negative correlation between high concentrations of serum-iron and -ferritin and  
107 low expression of ER $\alpha$  exists. We hypothesized that gradual iron accumulation in  
108 postmenopausal women could explain poor HRT efficacy when applied at a late stage.  
109 We used *ApoE*<sup>-/-</sup> aging female mice or ovariectomized (OVX) young mice as

110 estrogen-deficient AS models to examine ER $\alpha$  expression with respect to HRT  
111 efficacy and the genetic iron-overload mice in *ApoE*<sup>-/-</sup> background (*ApoE*<sup>-/-</sup>  
112 *Fpn1*<sup>LysM/LysM</sup>) to address the relation of iron metabolism and HRT efficacy. We found  
113 that ER $\alpha$  expression positively responded to E<sub>2</sub> administration under low or normal  
114 iron conditions and negatively responded to E<sub>2</sub> administration under high iron  
115 conditions. Our results explain the puzzle of HRT in early and late postmenopausal  
116 women, and the reason is the accelerated ER $\alpha$  proteolysis through iron-mediated  
117 upregulation of *Mdm2*.

118

## 119 **2. Methods and Materials**

### 120 **2.1 Participants**

121 Participants in this study included 20 postmenopausal (at least one year since  
122 menopause, without HRT) AS patients aged 54-84 years, recruited from the Vascular  
123 Surgery Department, The Affiliated Drum Tower Hospital, Nanjing University  
124 Medical School. Patients were divided into early (55-65 years old) and late (>65 years  
125 old) groups since menopause for over ten years was defined as late post-menopause.  
126 Twenty fasting serum samples were collected at the outpatient service. Of them, eight  
127 patients, undergoing carotid endarterectomy, were recruited, and plaque samples were  
128 collected immediately after separation. Exclusion criteria included the current use of  
129 oral contraceptives or other medications. Further details on the exclusion criteria were  
130 referenced (Wactawski-Wende *et al*, 2009). This study complies with the Declaration  
131 of Helsinki, and the Institutional Review Board of Nanjing Drum Tower Hospital, the  
132 Affiliated Hospital of Nanjing University Medical School, approved the study. All  
133 patients provided written informed consent.

134

### 135 **2.2 Animals**

136 *ApoE*<sup>-/-</sup> mice were obtained from the Model Animal Research Center of Nanjing  
137 University (Nanjing, China). *ApoE*<sup>-/-</sup> *Fpn1*<sup>LysM/LysM</sup> mice on the C57BL/6J background  
138 were generated in our previous study (Cai *et al.*, 2020). For the control experiments  
139 included in Results 2 and 6, female *ApoE*<sup>-/-</sup> mice at the age of 8 weeks (defined as

140 premenopausal) were anesthetized and bilaterally ovariectomized through a 1 cm  
141 dorsal incision. After surgery, mice were allowed to recover for one week and  
142 randomly divided into early and late groups. For each group, mice were fed a high-fat  
143 diet (0.2% cholesterol and 20% fat) and injected with saline, E<sub>2</sub> (3 µg/kg every other  
144 day, Solarbio, Beijing, China), or E<sub>2</sub>+DFP (80 mg/kg daily, Sigma–Aldrich, St. Louis,  
145 MO) for eight weeks from week nine as the early OVX group or week 21 as the late  
146 OVX group.

147 For the control experiments included in Result 3, female *ApoE*<sup>-/-</sup> and *ApoE*<sup>-/-</sup>  
148 *Fpn1*<sup>LysM/LysM</sup> mice were ovariectomized at the age of 16 or 40 weeks. E<sub>2</sub> injection (3  
149 µg/kg every other day) was performed one week after surgery for eight weeks. All  
150 animals were housed and fed standard chow in the SPF animal facility with an  
151 average 12 h light-and-dark cycle and under controlled temperature conditions  
152 (25°C). The mice were anesthetized with an intraperitoneal injection of pentobarbital  
153 sodium (40 mg/kg) and euthanized by cervical dislocation for sample collection. The  
154 protocols were approved by the Animal Investigation Ethics Committee of The  
155 Affiliated Drum Tower Hospital of Nanjing University Medical School and were  
156 performed according to the Guidelines for the Care and Use of Laboratory Animals  
157 published by the National Institutes of Health, USA.

158

### 159 **2.3 Cell culture**

160 J774a.1 cells, HUVECs, and MCF-7 cells were purchased from Cellcook  
161 (Guangzhou, China) and cultured in DMEM (Gibco, Life Technologies, UK)  
162 supplemented with 10% fetal bovine serum (FBS). Peritoneal macrophages were  
163 collected from peritoneal exudates three days after injecting 8-week-old mice with 0.3  
164 ml of 4% BBL thioglycollate, Brewer modified (BD Biosciences, Shanghai, China),  
165 and then cultured in RPMI 1640 medium supplemented with 10% (FBS) for 8 h.  
166 Macrophages were cultured in a medium containing 50 µg/ml human oxidized low-  
167 density lipoprotein (oxLDL) in the presence of 1 µM E<sub>2</sub>, 100 µM ferric ammonium  
168 citrate (FAC), 350 µM DFP or indicated combination for 48 h as needed.

169 Oil Red O staining was performed to evaluate foam cell formation. The

170 quantification was carried out with the following formula: relative average area of the  
171 fat droplet (%) = Target (Area of fat droplets/Numbers of cells)/Control (Area of fat  
172 droplets/Number of cells)\*100%. The area was analyzed by ImageJ software.  
173 Angiogenesis assays were performed to evaluate angiogenic capacity. Cellular iron  
174 levels were estimated using ferrozine assays. The protein levels of ER $\alpha$ , ABCA1,  
175 VEGF, TfR1, and Ft-L were determined by Western blot analysis.

176

#### 177 **2.4 Isolation of peritoneal macrophages from mice**

178 The mice were intraperitoneally injected with 4% starch broth (NaCl 0.5 g, beef  
179 extract 0.3 g, peptone 1.0 g, and starch 3.0 g in 100 ml of distilled H<sub>2</sub>O) 3 days before  
180 euthanasia. After anesthesia, the abdominal skin was carefully cut to 1 cm, and 5-8 ml  
181 PBS with 3% FBS was injected into the enterocoele. After 10 min of massage, the  
182 liquid was extracted and centrifuged (1000 rpm, 5 min). The sediment was then plated  
183 into 6-well plates for attachment or cryopreserved for further assays.

184

#### 185 **2.5 Blood samples and tissue collection**

186 The mice were anesthetized with an intraperitoneal injection of pentobarbital  
187 sodium (40 mg/kg) and euthanized by cervical dislocation. Blood was drawn from the  
188 inferior vena cava and collected in heparinized tubes. Plasma was prepared by  
189 centrifugation (1200  $\times$ g) for 15 min at 4°C. Plasma samples were then stored at -80°C  
190 for the determination of serum iron, lipid and cytokine levels. The mice were then  
191 perfused with 4°C saline through the left ventricle. After perfusion, the arteries,  
192 hearts, livers, and spleens were harvested. The samples were fixed in 4%  
193 paraformaldehyde or quickly frozen at -80°C for further analysis.

194

#### 195 **2.6 Serum lipid content and lesion area in the aorta and the aortic root**

196 Lipid content was determined with Oil Red O to stain the aorta. To assess the  
197 atherosclerotic lesion area, the aorta was analyzed from the aorta arch to the  
198 abdominal aortic bifurcation. The quantification of lesion area and size was performed  
199 using ImageJ software. Serum cholesterol and triglycerides were measured by the

200 clinical laboratory of Nanjing Drum Tower Hospital using an autochemical analyser  
201 (Beckman Coulter AU5421, CA).

202

203

## 204 **2.7 Immunohistochemistry (IHC) and Prussian blue staining**

205 Sections of mouse aortic valve or patient carotid artery plaques were used to  
206 assess the plaque iron composition by IHC staining for Ft-L and Prussian blue  
207 staining with DAB enhancement for ferric iron. The primary antibody against Ft-L  
208 was made using recombinant human Ft-L subunit as antigen by GenScript (Nanjing,  
209 China).

210 Images were captured under a light microscope (Leica, Germany). For quantitative  
211 analysis of images, three sections per animal at intervals of 30  $\mu\text{m}$  were analyzed. The  
212 intensity of positive staining was analyzed by ImageJ software.

213

## 214 **2.8 Iron assays**

215 Deparaffinized tissue sections were stained with Prussian blue staining for  
216 nonheme iron as previously described (Wang *et al*, 2016). Serum iron was measured  
217 by the clinical laboratory of Nanjing Drum Tower Hospital using an autochemical  
218 analyser (Beckman Coulter AU5421, CA). Total nonheme iron in the tissues was  
219 measured by colorimetric ferrozine-based assays as previously described (Li *et al*,  
220 2018). Briefly, 22  $\mu\text{l}$  concentrated HCl (11.6 M) was added to 100  $\mu\text{l}$  of homogenized  
221 tissue samples (approximately 500  $\mu\text{g}$  total protein). The sample was then heated at  
222 95°C for 20 min, followed by centrifugation at 12000 g for 10 min. The supernatant  
223 was transferred into a clean tube. Ascorbate was added to reduce the  $\text{Fe}^{3+}$  into  $\text{Fe}^{2+}$ .  
224 After 2 min of incubation at room temperature, ferrozine and saturated ammonium  
225 acetate ( $\text{NH}_4\text{Ac}$ ) were sequentially added to each tube, and the absorbance was  
226 measured at 570 nm (BioTek ELx800, Shanghai, China) within 30 min.

227

## 228 **2.9 Determination of eNOS and ferritin by ELISA**

229 eNOS (Abcam, Cambridge, MA) and ferritin (USBiological, #F4015-11,



230 Swampscott, MA) were detected by ELISA according to the manufacturer's protocols.

231

## 232 **2.10 Western blotting**

233 Protein lysates were run in gels and transferred to membranes as previously  
234 reported (Cai *et al*, 2018). The membranes were probed using antibodies directed  
235 against ER $\alpha$ , eNOS and VEGF purchased from Servicebio (Wuhan, China), ABCA1,  
236 BRCA1, AHR, and SOD2 from Abcam, TfR1 from ProteinTech Group Inc. (Chicago,  
237 IL), GAPDH from Bioworld Tech. (St. Louis Park, MN), ferritin L (Ft-L) made by  
238 using purified human ferritin L subunit as antigen by GenScript (Nanjing, China).

239

## 240 **2.11 Detection of catalase enzymatic activity**

241 The activities of catalase were measured following the manufacturer's protocols  
242 of the CAT assay kit (Jiancheng Bioengineering, Nanjing, China).

243

## 244 **2.22 Quantitative real-time PCR (qRT-PCR)**

245 Total cellular RNA was isolated from peritoneal macrophages using TRIzol  
246 (Invitrogen, Carlsbad, CA) and reversely transcribed to cDNA. qRT-PCR  
247 experiments were performed with SYBR Green PCR master mixture (Thermo Fisher  
248 Scientific). The primer sequences were as follows: 5'-  
249 TTATGGGGTCTGGTCCTGTG-3' and 5'- CATCTCTCTGACGCTTGTGC-3' for  
250 *Esr1*, 5'- GCCACTGCCGCATCCTCTTC-3' and 5'-  
251 AGCCTCAGGGCATCGGAACC-3' for *Actin*, and 5'-  
252 TGTCTGTGTCTACCGAGGGTG-3' and 5'-TCCAACGGACTTTAACAACCTTCA-  
253 3' for *Mdm2*.

254

## 255 **2.13 Immunoprecipitation (IP) and detection of ubiquitin**

256 ER $\alpha$  proteins were immunoprecipitated from J774a.1 cell lysates according to the  
257 manufacturer's protocols (11204D, Invitrogen). The ER $\alpha$  antibody was the same as  
258 that used for Western blotting and was purchased from Santa Cruz (1:200 dilution).  
259 Western blotting was used to detect the efficiency of IP and the level of ubiquitin.

260

## 261 **2.14 Angiogenesis assays**

262 Matrigel (50  $\mu$ L/well) was transferred to a 96-well plate, followed by inoculation  
263 of HUVECs ( $2 \times 10^4$  cells) and treatment with the medicines described in the cell  
264 culture. After 8 hours, images were captured with an inverted microscope. The extent  
265 of tube formation was assessed by measuring branch points and capillary length using  
266 the ‘Angiogenesis Analyser’ plug-in designed by Gilles Carpentier with ImageJ  
267 software.

268

## 269 **2.15 Statistical analysis**

270 All experiments were randomized and blinded. All the data are presented as the  
271 mean  $\pm$  SD. A two-tailed Student’s t-test (for two groups) or one-way analysis of  
272 variance followed by multiple comparisons test with Bonferroni correction (for more  
273 than two groups) was performed by using SPSS 17.0 (SPSS Inc, Chicago, IL).  
274  $P < 0.05$  indicated statistical significance.

275

## 276 **3. Results**

### 277 **3.1 ER $\alpha$ protein abundance correlates inversely with systemic and local plaque 278 iron content in aging postmenopausal women with AS.**

279 To build the link between iron contents and ER $\alpha$  levels in different  
280 postmenopausal stages, we collected 8 plaques and 20 blood samples from  
281 postmenopausal AS patients, divided a half into Early (55-65 years old, n=4/10,  
282 plaque/blood samples) and another half into Late (>66 years old, n=4/10) Post-  
283 Menopausal groups, EPM and LPM, respectively. Ferritin was evaluated by IHC,  
284 ELISA, and immunoblotting, and iron was evaluated by DAB-enhanced Prussian blue  
285 staining. As expected, both ferritin and iron levels were significantly increased in  
286 plaques and serum of the LPM, compared to the EPM (Figure 1A-C, E). In addition,  
287 serum cholesterol and triglycerides were elevated in the LPM (Figure 1D). By  
288 contrast, plaque ER $\alpha$  expression was lower in the EPM than in the LPM (Figure 1E).  
289 Pearson correlation analysis between ER $\alpha$  and ferritin levels in the plaques confirmed

290 that ER $\alpha$  levels were negatively correlated with iron levels (Figure 1F).

291

292 **3.2 AS aggravates in E<sub>2</sub>-treated LPM *ApoE*<sup>-/-</sup> mice with reduced ER $\alpha$  expression**  
293 **and accumulation of body iron.**

294 To determine whether the effect of HRT was atheroprotective in postmenopausal  
295 females, ovariectomy (OVX) was performed to mimic post-menopause in *ApoE*<sup>-/-</sup>  
296 female mice at eight weeks of age (Figure 2A). The mice started to be fed high-fat  
297 chow one week post OVX. Ages of 9 weeks and 21 weeks were considered as EPM  
298 and LPM stages, respectively. Although peritoneal E<sub>2</sub> injection in the EPM  
299 significantly reduced plaque formation, it remarkably promoted atherosclerotic  
300 development in the late application (Figure 2B and 2C), exactly as observed in  
301 humans (Hlatky *et al.*, 2002; Rossouw *et al.*, 2002). We then detected aortic ER $\alpha$   
302 expression to evaluate whether ER $\alpha$  was responsive to E<sub>2</sub> treatment. The results  
303 showed markedly lower ER $\alpha$  protein levels in the LPM mice than in the EPM mice  
304 (Figure 2D). More strikingly, ER $\alpha$  expression was further reduced in LPM mice after  
305 E<sub>2</sub> treatment but remained constantly high in EPM mice (Figure 2D). It has been  
306 reported that ER $\alpha$  protects against atherosclerosis by promoting lipid efflux and  
307 endothelial homeostasis (Wang *et al.*, 2021; Zhao *et al.*, 2021). Hence, we assessed  
308 three ER $\alpha$  downstream proteins, ABCA1, a lipid exporter whose gene promoter is  
309 predicted to have ERE, VEGF, an activator of angiogenesis, and eNOS, a modulator  
310 of vasoconstriction and vascular repair. They were all positively correlated with ER $\alpha$   
311 expression (Figure 2D). Macrophage-derived foam cell formation is crucial in the  
312 development of atherogenesis (Xu *et al.*, 2021). We therefore isolated peritoneal  
313 macrophages from early and late OVX mice after E<sub>2</sub> treatment and surprisingly found  
314 that the expression of ER $\alpha$ , ABCA1, and VEGF responded to E<sub>2</sub> treatment similarly  
315 as observed in aortic tissue (Figure 2E). In line with this observation, serum  
316 cholesterol and triglycerides negatively correlated with ER $\alpha$  and ABCA1 (Figure 2F).  
317 Our previous data have demonstrated that macrophage iron plays a critical role in the  
318 development of AS (Cai *et al.*, 2020); therefore, iron-related proteins were monitored.  
319 Ferritin was reduced in response to E<sub>2</sub> treatment in the EPM stage. In contrast, ferritin

320 remained high in the late stage after E<sub>2</sub> treatment in both aortae and isolated  
321 macrophages (Figure 2D and 2E), which could be explained by the response of Fpn1  
322 expression that was decreased in the EPM stage but not in the LPM stage. Both serum  
323 and tissue iron levels were significantly higher in the LPM mice (Figure 2G-2H, LPM  
324 vs. EPM without E<sub>2</sub> treatment). Interestingly, E<sub>2</sub> treatment elevated serum iron while  
325 lowering tissue iron in both EPM and LPM stages (Figure 2G-H, E<sub>2</sub> treatment vs.  
326 saline) suggesting impaired iron homeostasis in the plaque area, particularly in  
327 macrophages (Figure 2E) and confirming that estrogen modulates iron homeostasis as  
328 previously suggested (Yang *et al.*, 2012).

329

### 330 **3.3 E<sub>2</sub> downregulates ER $\alpha$ expression in an iron-dependent manner.**

331 Next, we aimed to identify whether aging or iron overload alone could trigger a  
332 decrease in ER $\alpha$  expression *in vivo*. To address this question, myeloid-specific *Fpn1*  
333 knockout mice (*Fpn1*<sup>LysM/LysM</sup>) were used as a macrophage-iron overload model in the  
334 *ApoE*<sup>-/-</sup> background (Cai *et al.*, 2020). This double knockout (KO) model is  
335 considered relevant for AS studies due to the accumulation of a large number of  
336 macrophages in plaques, which contributes to the progression of atherosclerosis  
337 (Moore *et al.*, 2013). OVX was performed in female mice fed standard chow at 16  
338 weeks or 40 weeks of age, and E<sub>2</sub> was injected to model HRT, as illustrated in Figure  
339 3A. Figures 3B and 3C show the severity of atherosclerosis, which was significantly  
340 enhanced in the E<sub>2</sub>-treated groups at both ages compared to the saline groups of *ApoE*  
341 <sup>-/-</sup> *Fpn1*<sup>LysM/LysM</sup>. Notably, macrophage *Fpn1* KO mice displayed a larger lesion area  
342 after E<sub>2</sub> treatment at the EPM and LPM stages (Figure 3C), suggesting a dominant  
343 influence of iron on the effects of the E<sub>2</sub> treatment. In particular, the specific iron  
344 overload in macrophages, characteristic of the mouse model used, was sufficient to  
345 cause a significant increase in the lesion area in the LPM group (Figure 3C, lower  
346 panel), reproducing previous observations (Cai *et al.*, 2020). We then examined the  
347 iron status in tissues and serum. Iron levels in tissues (aorta/liver) were higher in  
348 *ApoE*<sup>-/-</sup> *Fpn1*<sup>LysM/LysM</sup> compared to *ApoE*<sup>-/-</sup> mice, as revealed by ferrozine assays  
349 (Figure S1A for EPM groups and Figure 3E for LPM groups) and further supported

350 by higher ferritin content (Figure S1B for EPM and Figure 3D for LPM). On the  
351 contrary, serum iron was lower in *ApoE<sup>-/-</sup>Fpn1<sup>LysM/LysM</sup>* mice at the EPM and LPM  
352 stages (Figure 3F and S1C). However, E<sub>2</sub> administration did not significantly reduce  
353 the ferritin levels and iron levels in the aorta and liver (Figure 3D, 3E, and Figure  
354 S1A), confirming that Fpn1 acts as an iron exporter and that macrophages play a  
355 crucial role in response to E<sub>2</sub> treatment. E<sub>2</sub> administration significantly increased  
356 serum iron levels in the LPM group (Figure 3F) and mildly increased serum iron  
357 levels in the EPM group (Figure S1C), suggesting that other factors besides iron also  
358 contribute to the aging-related physiological changes in the E<sub>2</sub> treatment response. Of  
359 note, ERα was downregulated in the aorta of the *Fpn1<sup>LysM/LysM</sup>* mice and further  
360 downregulated by E<sub>2</sub> treatment, accompanied by reduced expression of ABCA1 and  
361 VEGF (Figure 3B and Figure S1B), suggesting that both iron alone and iron plus E<sub>2</sub>  
362 could downregulate ERα expression in macrophages. Consistent with the severity of  
363 atherosclerosis and the alteration of ERα and its target gene ABCA1, serum  
364 cholesterol and triglycerides were increased in the *Fpn1<sup>LysM/LysM</sup>* mice and further  
365 increased by E<sub>2</sub> treatment (Figure 3G).

366

#### 367 **3.4 E<sub>2</sub> treatment potentiates iron-induced downregulation of ERα in both** 368 **macrophages and endothelial cells.**

369 To further validate the interaction between iron and E<sub>2</sub> on ERα downregulation in  
370 different cell types, we used primary peritoneal macrophages from C57BL/6 female  
371 mice, the macrophage-like cell line J774a.1, and human umbilical vein endothelial  
372 cells (HUVECs). The cells were treated with E<sub>2</sub>, ferric ammonium citrate (FAC, an  
373 iron source), and/or deferiprone (DFP, an iron chelator). Downregulation of ERα  
374 expression triggered by FAC with or without E<sub>2</sub> was observed in time- and  
375 concentration-dependent manners (Figure 4A and 4B). Such downregulation was  
376 confirmed in all tested cell types and could be partially suppressed by iron chelation  
377 (Figure 4C, 4D, 4E, and 4F).

378 To examine the capacity of lipid export when ERα was downregulated, we loaded  
379 J774a.1 with oxidized low-density lipoprotein (oxLDL) and observed significantly

380 more lipid accumulation in the E<sub>2</sub>-treated plus iron overload group than in the other  
381 groups (Figure 4G), suggesting a tendency of macrophages to be converted into foam  
382 cells. Angiogenesis assays were also performed and showed that E<sub>2</sub>, together with  
383 iron, inhibited angiogenesis (Figure 4H), which has been demonstrated to increase the  
384 risk of macrophage adhesion and intraplaque hemorrhage (Chang & Nguyen, 2021;  
385 Mao *et al.*, 2020). The reduced levels of eNOS were also revealed by ELISA in  
386 HUVECs treated with E<sub>2</sub> and iron (Figure 4I). Overall, our data strongly support that  
387 both macrophages and endothelial cells are the effectors of E<sub>2</sub> in iron-mediated  
388 worsening by downregulation of ER $\alpha$  in the development of AS.

389

### 390 **3.5 Proteasome-mediated ER $\alpha$ degradation results from the interactive effects of** 391 **iron overload and E<sub>2</sub> treatment mediated by the E3 ligase Mdm2.**

392 We wondered how excess iron and E<sub>2</sub> together downregulated ER $\alpha$  expression.  
393 To elucidate the underlying mechanism, we first searched for what regulates ER $\alpha$   
394 expression. It was reported that the downregulation of ER $\alpha$  could be attributed to  
395 methylation of its promoter region, which could be induced by oxidative stress (Lung  
396 *et al.*, 2020). Because iron overload has been massively correlated with oxidative  
397 stress, two relevant antioxidative enzymes, catalase (CAT) and superoxide dismutase  
398 (SOD) 2, were evaluated. The results did not show a significant difference between  
399 the control and E<sub>2</sub>/FAC treatments (Figure S2A and S2B). In addition, the mRNA  
400 level of ER $\alpha$  was examined and barely showed significant changes after FAC and E<sub>2</sub>  
401 treatment (Figure S2C), suggesting posttranscriptional regulation of ER $\alpha$  better  
402 explained the decreased presence of the receptor after iron and/or E<sub>2</sub> treatment.

403 As stated previously, ER $\alpha$  may be regulated through an estrogen-ER $\alpha$  binding-  
404 dependent ubiquitination signaling pathway for degradation and estrogen recycling.  
405 To test this possibility, we treated J774a.1 cells with MG132, a proteasome inhibitor,  
406 and observed that ER $\alpha$  protein levels were significantly elevated in the presence of E<sub>2</sub>  
407 and excess iron (Figure 5A). Treatment with cycloheximide (CHX), an inhibitor of  
408 eukaryotic translation, showed that the half-life of ER $\alpha$  was shortened in the E<sub>2</sub> +  
409 FAC group (Figure 5B), suggesting a faster turnover rate of ER $\alpha$  in the presence of E<sub>2</sub>

410 plus excess iron, verifying the activation of ER $\alpha$  proteasome degradation pathway  
411 (Zhou & Slingerland, 2014). We then detected the ubiquitination levels of ER $\alpha$  by  
412 immunoprecipitation and immunoblotting. The results showed much more  
413 ubiquitinated and degraded ER $\alpha$  in the presence of E<sub>2</sub> and excess iron than in other  
414 conditions (Figure 5C), further supporting the proteolysis-dependent pathway for ER $\alpha$   
415 degradation. We then tested a few E3 ligases (BRCA1, AHR, and Mdm2) in J774a.1,  
416 which were supposed to regulate ER $\alpha$  (Fan *et al*, 2001; Khan *et al*, 2006; Saji *et al*,  
417 2001), and did not find a negative correlation between BRCA1/AHR and ER $\alpha$  in  
418 response to FAC or E<sub>2</sub>+FAC treatments (Figure S3A). However, *Mdm2* was  
419 upregulated in the FAC and E<sub>2</sub>+FAC groups (Figure 5D). When cells J774a.1 and  
420 HUVECs were treated with Nutlin-3, a well-known Mdm2 inhibitor, ER $\alpha$  exhibited  
421 iron-dependent Mdm2-mediated degradation (Figure 5E and 5F). Amazingly and  
422 consistently, Mdm2 expression was upregulated at the LPM stage compared with the  
423 EPM stage both in the aorta of female mice and in plaques of AS patients (Figures 5G  
424 and 5H), which is exactly opposite to ER $\alpha$  expression (Figure 1E). And this effect was  
425 significantly enhanced at the LPM stage mice when E<sub>2</sub> was administrated (Figure 5G,  
426 2D and 2E). Our results indicate that Mdm2 is responsible for E<sub>2</sub>-triggered ER $\alpha$   
427 deficiency under iron overload condition or in LPM women.

428

### 429 **3.6 Iron restriction therapy restores ER $\alpha$ levels and attenuates E<sub>2</sub>-triggered** 430 **progressive atherosclerosis in late postmenopausal mice.**

431 To further verify whether iron overload is responsible for the E<sub>2</sub>-induced  
432 downregulation of ER $\alpha$  and progressive atherosclerosis in LPM mice, we evaluated  
433 the effects of iron restriction. Twenty-one-week-old female *ApoE*<sup>-/-</sup> mice, OVX-ed at  
434 eight weeks of age, received iron chelation therapy through peritoneal injection of  
435 DFP (80 mg/kg) daily for eight weeks (Figure 6A). Similar to the definition used in  
436 Figure 2, 13 weeks after OVX was considered as the LPM stage. Indeed, iron  
437 chelation attenuated the plaque-accelerated development of AS (Figure 6B and 6C).  
438 The contents of serum cholesterol and triglycerides compared with those in the E<sub>2</sub>-  
439 only group were significantly diminished (Figure 6D). Consistent with previous data

440 (Figures 2 and 3), ferrozine assays proved decreased iron deposition in tissues but  
441 increased iron in serum post E<sub>2</sub> application (Figure 6E-F). Although DFP  
442 administration reduced the tissue and serum iron levels, it did not induce anemia  
443 (Figure 6E-F), which was comparable to the mice at EPM (Figure 2G and H). We then  
444 detected aortic ER $\alpha$  expression and found significant upregulation by iron restriction,  
445 along with the upregulation of ABCA1 and VEGF (Figure 6G). In contrast, iron  
446 chelation by DFP significantly reduced Mdm2 expression (Figure 6G). In agreement  
447 with our previous findings in cell-based assays, these results corroborate the concept  
448 that late postmenopausal HRT-induced ER $\alpha$  deficiency is, at least partially, iron  
449 overload-mediated. Thus, the non-atheroprotective effects of E<sub>2</sub> in the LPM result  
450 from aging-mediated iron accumulation.

451

#### 452 **4. Discussion**

453 Estrogen has long been considered atheroprotective and responsible for the low  
454 morbidity of cardiovascular diseases in premenopausal women (Lobo, 2017; Moss *et al.*,  
455 2019). However, epidemiological studies of the Women's Health Initiative  
456 question the beneficial effects of late postmenopausal HRT (Hlatky *et al.*, 2002).  
457 Although one hypothesis to explain this observation may be that iron potentiates the  
458 adverse effects of estrogen in AS (Sullivan, 1981; Sullivan, 2003), a comprehensive *in*  
459 *vivo* study to test this hypothesis was missing. We reported previously that the  
460 developmental course of atherosclerosis was highly accelerated in *ApoE*<sup>-/-</sup>  
461 *Fpn1*<sup>LysM/LysM</sup> mice compared with *ApoE*<sup>-/-</sup> (Cai *et al.*, 2020). Our present study  
462 provides the first experimental evidence that iron overload facilitates ER $\alpha$  proteolysis,  
463 which is potentiated in the presence of E<sub>2</sub> and reverses the anti-atherogenic effect of  
464 E<sub>2</sub> (Figure 7). Our results support the benefit of early application of estrogen post-  
465 menopause. We propose that the combination of HRT and iron restriction therapy may  
466 be a long-term strategy for the preventive effects of E<sub>2</sub> from the development of AS in  
467 post-menopausal women.

468 The controversy of whether or not to proceed with HRT in postmenopausal  
469 women is fueled by an increased, although small, risk of breast cancer and from the



470 potentially harmful effect on cardiovascular outcomes (Lobo, 2017). Previous  
471 randomized trials did not consider the ages sorting out EPM from LPM and have not  
472 excluded subjects with iron depletion or loss in the recruited post-menopausal subjects  
473 (Sullivan, 2003). We sorted the recruited female AS volunteers from the Department  
474 of Vascular Surgery of Nanjing Drum Tower Hospital as EPM and LPM groups to  
475 reveal whether aging-associated iron deposition correlates with ER $\alpha$  expression. The  
476 negative correlation between systemic iron status and intraplaque ER $\alpha$  expression was  
477 validated, which prompted us to address the role of iron in ER $\alpha$  expression.

478 Previous efforts focused more on the role of estrogen in iron metabolism  
479 (primarily the hepcidin/Fpn axis) and not *vice versa* (Hou *et al.*, 2012; Ikeda *et al.*,  
480 2012; Yang *et al.*, 2012). Both genes encoding hepcidin and Fpn are inhibited by E<sub>2</sub>  
481 treatment through an estrogen-responsive element (ERE) (Hou *et al.*, 2012; Qian *et al.*,  
482 2015; Yang *et al.*, 2012). However, it was also reported that hepcidin expression  
483 decreased in the livers of OVX mice through a GPR30-BMP6-dependent mechanism,  
484 independent of the ERE-mediated E<sub>2</sub>-ER $\alpha$  pathway (Ikeda *et al.*, 2012). Though the  
485 difference in hepcidin expression in OVX mice (Bowling *et al.*, 2014; Gavin *et al.*,  
486 2009; Hou *et al.*, 2012; Ikeda *et al.*, 2012), the consistent with this study here is that  
487 aging, OVX, and genetic manipulation of Fpn induced progressive iron retention in  
488 tissues, accompanied by reduced ER $\alpha$  expression. E<sub>2</sub> administration further enhanced  
489 this reduction in ER $\alpha$  levels under the above-mentioned conditions. Overall, high  
490 ER $\alpha$  levels are found in reproductive women, despite fluctuations caused by the  
491 periodic estrogen wave and blood loss in reproductive women (Gavin *et al.*, 2009).  
492 The aging process, particularly in late postmenopausal women, progressively elevates  
493 iron levels which we show, downregulates ER $\alpha$ , resulting in insufficient ER $\alpha$  to  
494 respond to E<sub>2</sub> treatment. Therefore, HRT is unlikely to result in an effective outcome  
495 in LPM women as in EPM women unless it is coupled with an iron-chelating scheme.  
496 This is because aggravated AS in LPM women is, at least partially, the result of age-  
497 related iron accumulation. We demonstrated the effectiveness of iron chelation in  
498 improving HRT outcomes in the mouse model, but further work is required to  
499 translate this finding for clinical practice.

500 ER $\alpha$  is the main effector of estrogen on cardiovascular function (Aryan *et al*,  
501 2020; Meng *et al*, 2021). We wondered how iron downregulated ER $\alpha$ . Since several  
502 E3 ubiquitin ligases (*i.e.*, CHIP, E6AP, BRCA1, BARD1, SKP2, and Mdm2) have  
503 been found to catalyze the covalent binding of ubiquitin to lysine residues of ER $\alpha$   
504 (reviewed in (Tecalco-Cruz & Ramirez-Jarquin, 2017), we tested them and found that  
505 Mdm2 is responsive to iron treatment in cells and mice and negatively correlated with  
506 ER $\alpha$ , particularly under high iron conditions. Furthermore, we showed that Mdm2 is a  
507 negative regulator of ER $\alpha$ .

508 Our findings may be context specific, as some differences are noted in its studied  
509 roles in some cancer cell types (Dongiovanni *et al*, 2010; Zhang *et al*, 2020). Mdm2  
510 acts as a ubiquitin ligase E3 to p53 in SV40 hepatocytes (Honda *et al*, 1997) and has  
511 been shown to act as a direct coactivator of ER $\alpha$  function in ER $\alpha$ -positive breast  
512 cancer (Saji *et al.*, 2001). Nevertheless, iron-dependent downregulation was revealed  
513 in leukemia cell lines and primary human cells derived from acute myeloid leukemia  
514 patients (Calabrese *et al*, 2020), suggesting a cell-type-specific regulation of Mdm2  
515 by iron. In our study, the downregulation of Mdm2 by E<sub>2</sub> occurred in the context of  
516 iron overload both *in vivo* and *in vitro*, concluding that Mdm2 is the critical mediator  
517 that participates in iron overload triggered ER $\alpha$  loss.

518 In summary, this study demonstrates the impact of iron overload in E<sub>2</sub>-mediated  
519 ER $\alpha$  proteolysis and its critical consequence on the outcome of HRT. With the  
520 efficacy of HRT challenged by “the window of opportunity” theory (Yesufu *et al*,  
521 2007), it is vital to explore therapies that maintain ER $\alpha$  expression mediating the  
522 protective effects of estrogen. Although further work is needed to determine whether  
523 iron restriction therapy is clinically relevant in combination with HRT for the  
524 intervention of postmenopausal atherosclerosis as a long-term strategy, this paper  
525 provides guidance for optimizing the timing HRT intervention and supportive nutrient  
526 management.

527

528 **5. Funding:**

529 This work was supported by the National Natural Science Foundation of China  
530 [grant numbers: 31871201, 81870348].

531

532 6. **Conflict of Interest:** none declared.

533

## 534 7. References

- 535 Aryan L, Younessi D, Zargari M, Banerjee S, Agopian J, Rahman S, Bornha R, Ruffenach G, Umar S,  
536 Eghbali M (2020) The Role of Estrogen Receptors in Cardiovascular Disease. *Int J Mol Sci* 21
- 537 Badenhorst C, Goto K, O'Brien W, Sims S (2021) Iron status in athletic females, a shift in perspective on  
538 an old paradigm. *Journal of sports sciences*: 1-11
- 539 Bowling MR, Xing D, Kapadia A, Chen YF, Szalai AJ, Oparil S, Hage FG (2014) Estrogen effects on  
540 vascular inflammation are age dependent: role of estrogen receptors. *Arterioscler Thromb Vasc Biol*  
541 34: 1477-1485
- 542 Cai J, Jiang Y, Zhang M, Zhao H, Li H, Li K, Zhang X, Qiao T (2018) Protective effects of mitochondrion-  
543 targeted peptide SS-31 against hind limb ischemia-reperfusion injury. *Journal of physiology and*  
544 *biochemistry* 74: 335-343
- 545 Cai J, Zhang M, Liu Y, Li H, Shang L, Xu T, Chen Z, Wang F, Qiao T, Li K (2020) Iron accumulation in  
546 macrophages promotes the formation of foam cells and development of atherosclerosis. *Cell &*  
547 *biochemistry* 10: 137
- 548 Calabrese C, Panuzzo C, Stanga S, Andreani G, Ravera S, Maglione A, Pironi L, Petiti J, Shahzad Ali M,  
549 Scaravaglio P *et al* (2020) Deferasirox-Dependent Iron Chelation Enhances Mitochondrial Dysfunction  
550 and Restores p53 Signaling by Stabilization of p53 Family Members in Leukemic Cells. *International*  
551 *journal of molecular sciences* 21
- 552 Chang M, Nguyen T (2021) Strategy for Treatment of Infected Diabetic Foot Ulcers. *Accounts of*  
553 *chemical research* 54: 1080-1093
- 554 Dongiovanni P, Fracanzani AL, Cairo G, Megazzini CP, Gatti S, Rametta R, Fargion S, Valenti L (2010)  
555 Iron-Dependent Regulation of MDM2 Influences p53 Activity and Hepatic Carcinogenesis. *The*  
556 *American Journal of Pathology* 176: 1006-1017
- 557 Duong V, Boulle N, Daujat S, Chauvet J, Bonnet S, Neel H, Cavailles V (2007) Differential regulation of  
558 estrogen receptor alpha turnover and transactivation by Mdm2 and stress-inducing agents. *Cancer Res*  
559 67: 5513-5521
- 560 Fan S, Ma YX, Wang C, Yuan RQ, Meng Q, Wang JA, Erdos M, Goldberg ID, Webb P, Kushner PJ *et al*  
561 (2001) Role of direct interaction in BRCA1 inhibition of estrogen receptor activity. *Oncogene* 20: 77-87
- 562 Gavin K, Seals D, Silver A, Moreau K (2009) Vascular endothelial estrogen receptor alpha is modulated  
563 by estrogen status and related to endothelial function and endothelial nitric oxide synthase in healthy  
564 women. *The Journal of clinical endocrinology and metabolism* 94: 3513-3520
- 565 Gu C, Xie F, Zhang B, Yang H, Cheng J, He Y, Zhu X, Li D, Li M (2018) High Glucose Promotes Epithelial-  
566 Mesenchymal Transition of Uterus Endometrial Cancer Cells by Increasing ER/GLUT4-Mediated VEGF  
567 Secretion. *Cellular physiology and biochemistry : international journal of experimental cellular*  
568 *physiology, biochemistry, and pharmacology* 50: 706-720
- 569 Hlatky M, Boothroyd D, Vittinghoff E, Sharp P, Whooley M (2002) Quality-of-life and depressive

570 symptoms in postmenopausal women after receiving hormone therapy: results from the Heart and  
571 Estrogen/Progestin Replacement Study (HERS) trial. *JAMA* 287: 591-597

572 Honda R, Tanaka H, Yasuda H (1997) Oncoprotein MDM2 is a ubiquitin ligase E3 for tumor suppressor  
573 p53. *FEBS Letters* 420: 25-27

574 Hou Y, Zhang S, Wang L, Li J, Qu G, He J, Rong H, Ji H, Liu S (2012) Estrogen regulates iron homeostasis  
575 through governing hepatic hepcidin expression via an estrogen response element. *Gene* 511: 398-403

576 Huang X, Xu Y, Partridge N (2013) Dancing with sex hormones, could iron contribute to the gender  
577 difference in osteoporosis? *Bone* 55: 458-460

578 Ikeda Y, Tajima S, Izawa-Ishizawa Y, Kihira Y, Ishizawa K, Tomita S, Tsuchiya K, Tamaki T (2012) Estrogen  
579 regulates hepcidin expression via GPR30-BMP6-dependent signaling in hepatocytes. *PLoS One* 7:  
580 e40465

581 Khan S, Barhoumi R, Burghardt R, Liu S, Kim K, Safe S (2006) Molecular mechanism of inhibitory aryl  
582 hydrocarbon receptor-estrogen receptor/Sp1 cross talk in breast cancer cells. *Mol Endocrinol* 20:  
583 2199-2214

584 Li H, Zhao H, Hao S, Shang L, Wu J, Song C, Meyron-Holtz E, Qiao T, Li K (2018) Iron regulatory protein  
585 deficiency compromises mitochondrial function in murine embryonic fibroblasts. *Scientific reports* 8:  
586 5118

587 Lobo RA (2017) Hormone-replacement therapy: current thinking. *Nat Rev Endocrinol* 13: 220-231

588 Lung D, Reese R, Alarid E (2020) Intrinsic and Extrinsic Factors Governing the Transcriptional  
589 Regulation of ESR1. *Hormones & cancer* 11: 129-147

590 Mao Y, Liu X, Song Y, Zhai C, Xu X, Zhang L, Zhang Y (2020) Fibroblast growth factor-2/platelet-derived  
591 growth factor enhances atherosclerotic plaque stability. *Journal of cellular and molecular medicine* 24:  
592 1128-1140

593 Meng Q, Li Y, Ji T, Chao Y, Li J, Fu Y, Wang S, Chen Q, Chen W, Huang F *et al* (2021) Estrogen prevent  
594 atherosclerosis by attenuating endothelial cell pyroptosis via activation of estrogen receptor alpha-  
595 mediated autophagy. *J Adv Res* 28: 149-164

596 Moore KJ, Sheedy FJ, Fisher EA (2013) Macrophages in atherosclerosis: a dynamic balance. *Nat Rev*  
597 *Immunol* 13: 709-721

598 Moss M, Carvajal B, Jaffe I (2019) The endothelial mineralocorticoid receptor: Contributions to sex  
599 differences in cardiovascular disease. *Pharmacology & therapeutics* 203: 107387

600 Murphy E (2011) Estrogen signaling and cardiovascular disease. *Circulation research* 109: 687-696

601 Nemeth E, Tuttle MS, Powelson J, Vaughn MB, Donovan A, Ward DM, Ganz T, Kaplan J (2004) Hepcidin  
602 regulates cellular iron efflux by binding to ferroportin and inducing its internalization. *Science* 306:  
603 2090-2093

604 Pinzone J, Stevenson H, Strobl J, Berg P (2004) Molecular and cellular determinants of estrogen  
605 receptor alpha expression. *Molecular and cellular biology* 24: 4605-4612

606 Qian Y, Yin C, Chen Y, Zhang S, Jiang L, Wang F, Zhao M, Liu S (2015) Estrogen contributes to regulating  
607 iron metabolism through governing ferroportin signaling via an estrogen response element. *Cell Signal*  
608 27: 934-942

609 Ribas V, Drew B, Le J, Soleymani T, Daraei P, Sitz D, Mohammad L, Henstridge D, Febbraio M, Hewitt S  
610 *et al* (2011) Myeloid-specific estrogen receptor alpha deficiency impairs metabolic homeostasis and  
611 accelerates atherosclerotic lesion development. *Proceedings of the National Academy of Sciences of*  
612 *the United States of America* 108: 16457-16462

613 Rocca WA, Grossardt BR, Shuster LT (2014) Oophorectomy, estrogen, and dementia: a 2014 update.

614 *Mol Cell Endocrinol* 389: 7-12

615 Rossouw J, Anderson G, Prentice R, LaCroix A, Kooperberg C, Stefanick M, Jackson R, Beresford S,  
616 Howard B, Johnson K *et al* (2002) Risks and benefits of estrogen plus progestin in healthy  
617 postmenopausal women: principal results From the Women's Health Initiative randomized controlled  
618 trial. *JAMA* 288: 321-333

619 Saji S, Okumura N, Eguchi H, Nakashima S, Suzuki A, Toi M, Nozawa Y, Saji S, Hayashi S (2001) MDM2  
620 enhances the function of estrogen receptor alpha in human breast cancer cells. *Biochem Biophys Res*  
621 *Commun* 281: 259-265

622 Sullivan J (1981) Iron and the Sex Difference in Heart Disease Risk. *The Lancet* 317: 1293-1294

623 Sullivan JL (2003) Are menstruating women protected from heart disease because of, or in spite of,  
624 estrogen? Relevance to the iron hypothesis. *American Heart Journal* 145: 190-194

625 Tecalco-Cruz AC, Ramirez-Jarquín JO (2017) Mechanisms that Increase Stability of Estrogen Receptor  
626 Alpha in Breast Cancer. *Clin Breast Cancer* 17: 1-10

627 Teoh J, Li X, Simoncini T, Zhu D, Fu X (2020) Estrogen-Mediated Gaseous Signaling Molecules in  
628 Cardiovascular Disease. *Trends in endocrinology and metabolism: TEM* 31: 773-784

629 Vinchi F, Porto G, Simmelbauer A, Altamura S, Passos S, Garbowski M, Silva A, Spaich S, Seide S, Sparla  
630 R *et al* (2020) Atherosclerosis is aggravated by iron overload and ameliorated by dietary and  
631 pharmacological iron restriction. *European heart journal* 41: 2681-2695

632 Wactawski-Wende J, Schisterman E, Hovey K, Howards P, Browne R, Hediger M, Liu A, Trevisan M  
633 (2009) BioCycle study: design of the longitudinal study of the oxidative stress and hormone variation  
634 during the menstrual cycle. *Paediatric and perinatal epidemiology* 23: 171-184

635 Wang G, Chen J, Deng W, Ren K, Yin S, Yu X (2021) CTRP12 ameliorates atherosclerosis by promoting  
636 cholesterol efflux and inhibiting inflammatory response via the miR-155-5p/LXR $\alpha$  pathway. *Cell death*  
637 *& disease* 12: 254

638 Wang Q, Ji J, Hao S, Zhang M, Li K, Qiao T (2016) Iron Together with Lipid Downregulates Protein  
639 Levels of Ceruloplasmin in Macrophages Associated with Rapid Foam Cell Formation. *Journal of*  
640 *atherosclerosis and thrombosis* 23: 1201-1211

641 Xu J, Kitada M, Ogura Y, Koya D (2021) Relationship Between Autophagy and Metabolic Syndrome  
642 Characteristics in the Pathogenesis of Atherosclerosis. *Frontiers in cell and developmental biology* 9:  
643 641852

644 Yang Q, Jian J, Katz S, Abramson SB, Huang X (2012) 17 $\beta$ -Estradiol inhibits iron hormone hepcidin  
645 through an estrogen responsive element half-site. *Endocrinology* 153: 3170-3178

646 Yesufu A, Bandelow S, Hogervorst E (2007) Meta-analyses of the effect of hormone treatment on  
647 cognitive function in postmenopausal women. *Womens Health (Lond)* 3: 173-194

648 Zhang J, Kong X, Zhang Y, Sun W, Xu E, Chen X (2020) Mdm2 is a target and mediator of IRP2 in cell  
649 growth control. *FASEB journal : official publication of the Federation of American Societies for*  
650 *Experimental Biology* 34: 2301-2311

651 Zhang K, Yang Q, Yang L, Li Y, Wang X, Li Y, Dang R, Guan S, Guo Y, Sun T *et al* (2019) CB1 agonism  
652 prolongs therapeutic window for hormone replacement in ovariectomized mice. *The Journal of clinical*  
653 *investigation* 129: 2333-2350

654 Zhao Z, Wang X, Zhang R, Ma B, Niu S, Di X, Ni L, Liu C (2021) Melatonin attenuates smoking-induced  
655 atherosclerosis by activating the Nrf2 pathway via NLRP3 inflammasomes in endothelial cells. *Aging* 13  
656 Zhou W, Slingerland J (2014) Links between oestrogen receptor activation and proteolysis: relevance  
657 to hormone-regulated cancer therapy. *Nature reviews Cancer* 14: 26-38



659 **Figure 1 ER $\alpha$  levels were negatively associated with iron content in human**  
 660 **plaques.** (A) Ferritin (Ft-L), revealed by immunohistochemistry, and iron content,  
 661 revealed by DAB-enhanced Prussian blue staining, in plaque paraffin sections of 8  
 662 postmenopausal patients. The upper panel: the early postmenopausal (EPM) group  
 663 (P1-P4, < 65 years old); the lower panel: the late postmenopausal (LPM) group (P5-  
 664 P8, > 65 years old). (B) Serum iron in EPM (blue) and LPM (magenta) patients,  
 665 measured by using an autochemical analyser (Beckman Coulter AU5421, CA).  
 666 n=10/group, \*\*\* $p < 0.001$ . (C) Serum ferritin levels detected by ELISA. n=10/group,  
 667 \*\*\* $p < 0.001$ . (D) Serum total cholesterol (left) and total triglyceride (right) levels.  
 668 n=10/group, \* $p < 0.05$ , \*\* $p < 0.01$ . (E) ER $\alpha$  and Ft-L expression in plaques measured  
 669 by Western blotting. The samples are the same as in (A). (F) The plotted and  
 670 calculated Pearson correlation coefficient ( $r = -0.7205$ ) between the plaque Ft-L and  
 671 ER $\alpha$  levels (n=8,  $p = 0.0438$ ).

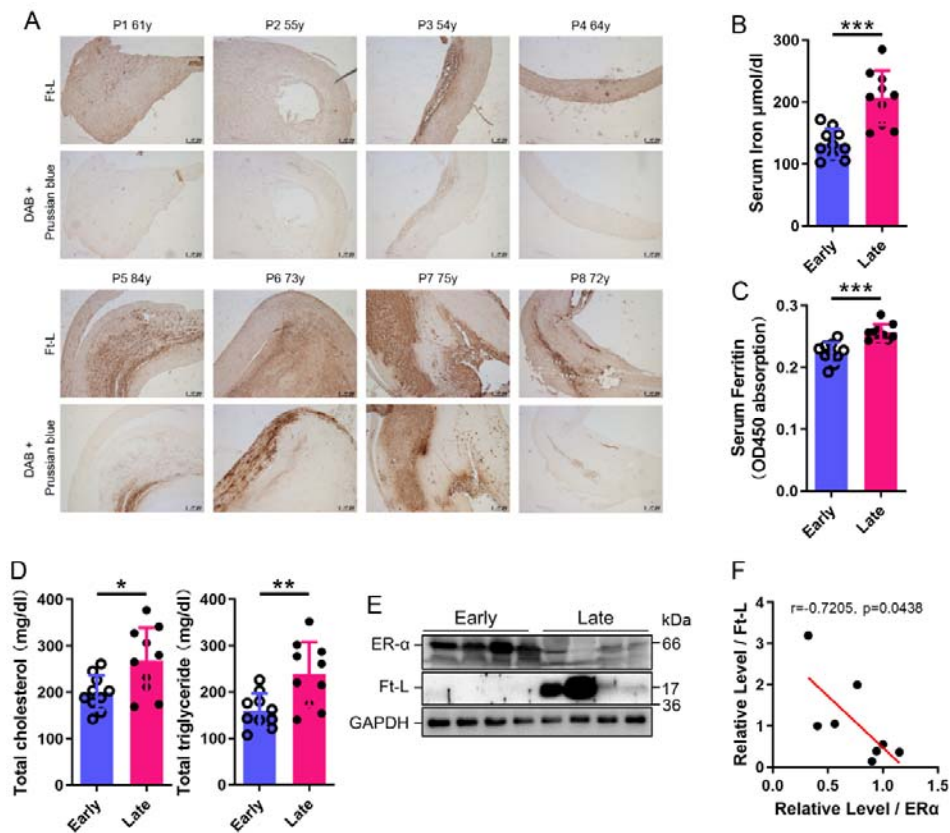

672

673

674

675

676

677

678

679

680

681 **Figure 2 Atherosclerosis was aggravated in E<sub>2</sub>-treated late postmenopausal**

682 ***ApoE*<sup>-/-</sup> mice with lower ER $\alpha$  expression.** (A) Flow diagram of mouse modeling.  
683 Early E<sub>2</sub>-treatment group: OVX at 8 weeks old, one-week recovery, E<sub>2</sub> treatment for 8  
684 weeks; late E<sub>2</sub>-treatment group: OVX at 8 weeks old, E<sub>2</sub> treatment from 21 weeks old  
685 to 29 weeks old for 8 weeks. Saline is vehicle control. Mice were fed high-fat chow  
686 from 9 weeks old. (B) Oil red O-stained aortic lesions in *ApoE*<sup>-/-</sup> mice after E<sub>2</sub>  
687 treatment for 8 weeks in the EPM or LPM group. (C) Statistical analysis of the area of  
688 atherosclerotic plaque in the aorta. n = 4/group, \**p* < 0.05, \*\* *p* < 0.01. (D) The  
689 expression of iron-related or ER $\alpha$ -targeted proteins in the aorta, detected by Western  
690 blotting. (E) Protein expression in peritoneal macrophages detected by Western  
691 blotting. Macrophages were isolated from 4 mouse groups (early/late  $\pm$  E<sub>2</sub>, details see  
692 **Materials and Methods**). (F) Serum total cholesterol and total triglyceride levels in  
693 the 4 mouse groups. Pre: serum samples before OVX as a control group. n=6/group,  
694 \**p* < 0.05, \*\* *p* < 0.01. (G) Iron content in aorta and liver, detected by ferrozine  
695 assays. n = 6/group, \*\*\*\**p* < 0.0001, \*\**p* < 0.01, \**p* < 0.05. (H) Serum iron in  
696 different groups, detected by using an autochemical analyser (Beckman Coulter  
697 AU5421). n = 6/group, \*\*\**p* < 0.001, \*\**p* < 0.01. Student's *t*-test analysis was used  
698 for C, F, G, and H.



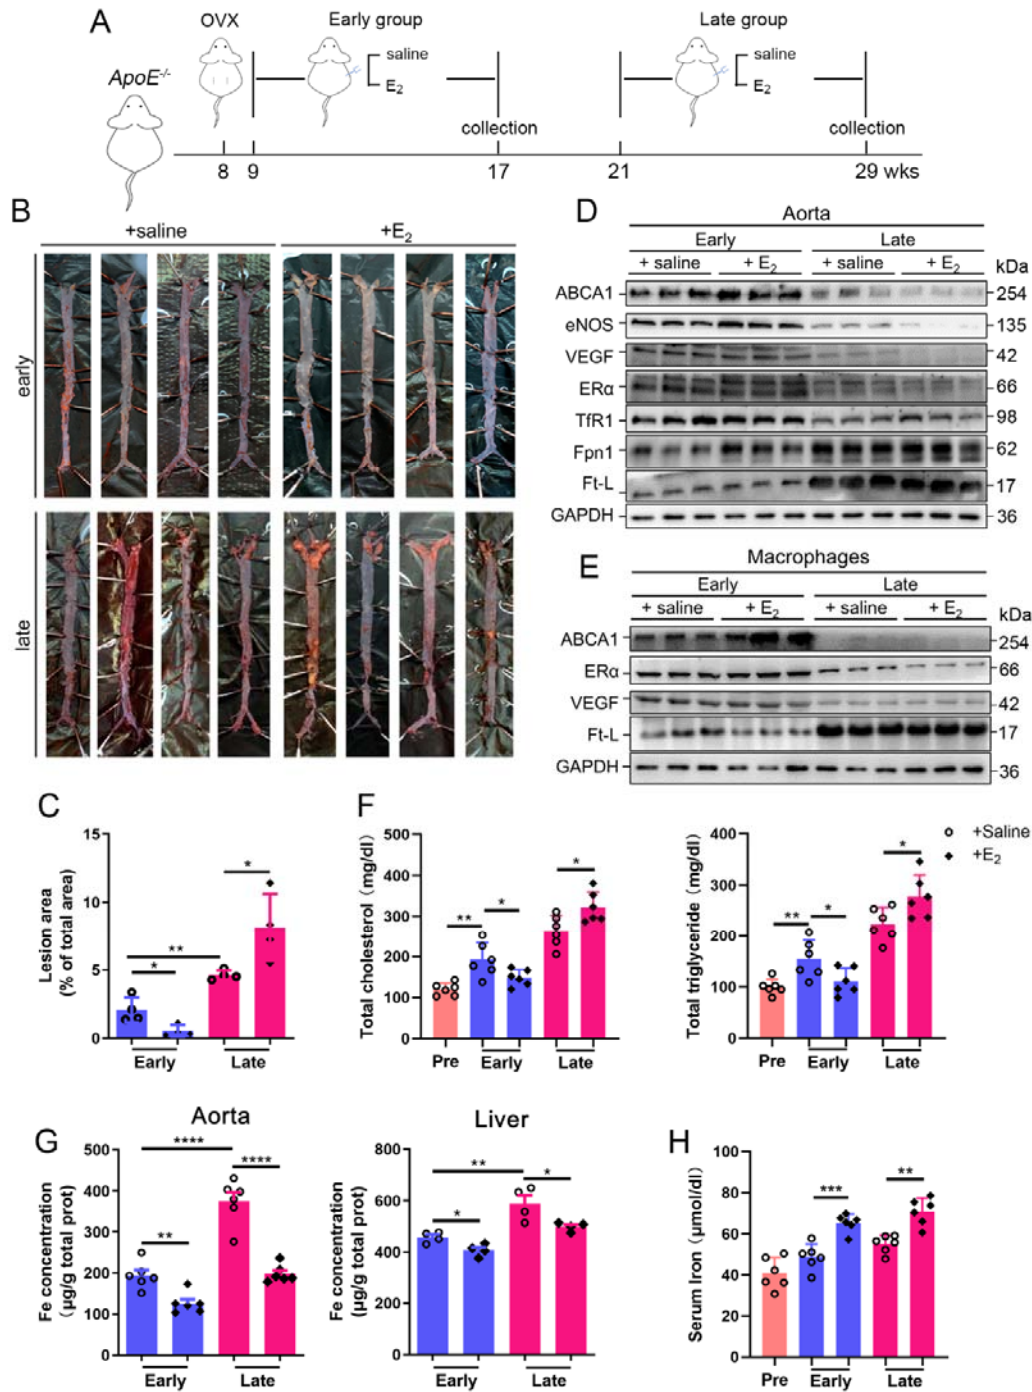

699

700

701 **Figure 3 E<sub>2</sub>-triggered ER $\alpha$  deficiency was observed in a genetic iron overload**  
702 **mouse model at postmenopausal age.** (A) Flow diagram of mouse modeling. Early  
703 groups: OVX at 16 weeks old, one-week recovery,  $\pm$  E<sub>2</sub> treatment for 8 weeks; late  
704 groups: OVX at 40 weeks old, one-week recovery,  $\pm$  E<sub>2</sub> treatment for 8 weeks. Saline  
705 is vehicle control. The mice were fed with normal chow. (B) Oil red O-stained aortic  
706 lesions in *ApoE<sup>-/-</sup>* and *ApoE<sup>-/-</sup> Fpn1<sup>LysM/LysM</sup>* mice after E<sub>2</sub> treatment for 8 weeks in the  
707 EPM or LPM groups as indicated. (C) The lesion area in the aorta. n = 4/group, \*\**p* <  
708 0.01, \**p* < 0.05. (D) The expression of iron-related or ER $\alpha$ -targeted proteins in the  
709 aorta, detected by Western blotting. (E) The iron content of the aorta and liver  
710 detected by ferrozine assays. n = 6/group, \*\*\**p* < 0.001, \*\**p* < 0.01. (F) Serum iron  
711 level in different groups. n = 6/group, \*\*\**p* < 0.001, \*\**p* < 0.01. (G) Serum total  
712 cholesterol and total triglyceride levels. n=6/group, \**p* < 0.05, \*\* *p* < 0.01. The  
713 samples for D-G were from 49-week-old *ApoE<sup>-/-</sup>* and *ApoE<sup>-/-</sup> Fpn1<sup>LysM/LysM</sup>* mice.  
714 Student's *t-test* analysis was used for C, E, F, and G.

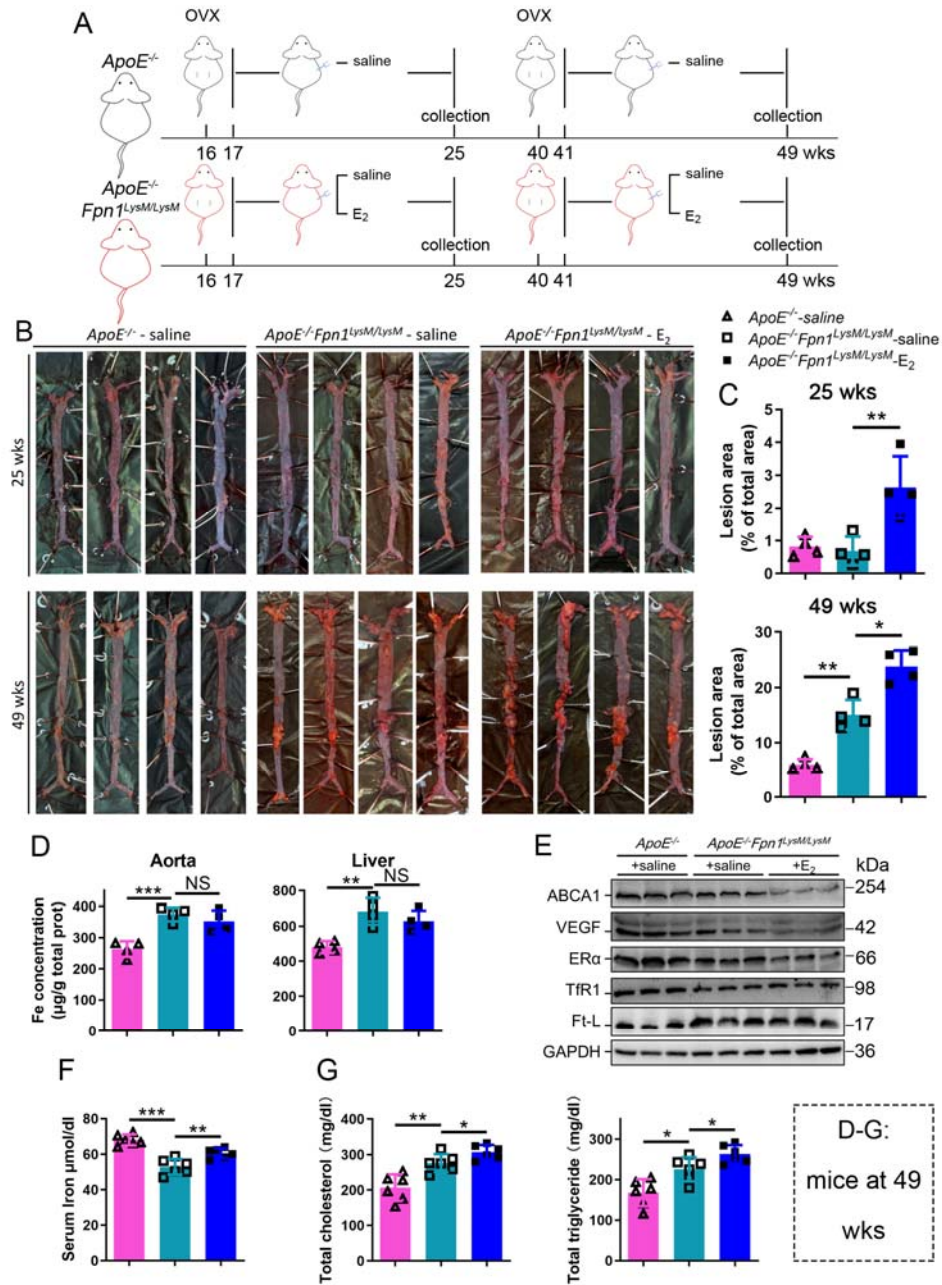

715

716 **Figure 4 E<sub>2</sub> treatment potentiates iron-induced downregulation of ERα *in vitro*.**  
717 (A-B) ERα expression in the presence or absence of E<sub>2</sub> under different iron  
718 concentration conditions (A) or in the time course (B). Quantification was carried out  
719 using ImageJ. Two-way ANOVA was used. (C) The rescue effect of iron chelation on  
720 the downregulation of ERα by FAC or FAC plus E<sub>2</sub>. (D) The intracellular iron content  
721 in J774a.1 under different iron-concentration conditions in the presence or absence of  
722 E<sub>2</sub>, detected by ferrozine assays. n = 4, \**p* < 0.05. (E, F) ERα expression in peritoneal  
723 macrophages (E) and HUVECs (F) under the indicated iron and E<sub>2</sub> conditions. A, B,  
724 C, E, and F are data from Western blotting. Numbers indicate the relative intensity of  
725 ERα n=4. (G) Oil red O-stained J774a.1 cells after treatment with FAC and/or E<sub>2</sub> (left)  
726 with the quantified droplets (right). scale bar = 25 μm, n = 4, \*\*\**p* < 0.001. (H)  
727 HUVEC angiogenesis assays, revealed by the number of branch points (left) and  
728 capillary length (right). n = 4, \**p* < 0.05, \*\**p* < 0.01. (I) eNOS level in HUVEC,  
729 assessed by ELISA. n = 4, \**p* < 0.05, \*\**p* < 0.01, \*\*\**p* < 0.001. The student's *t*-test  
730 analysis was used for G - I.  
731

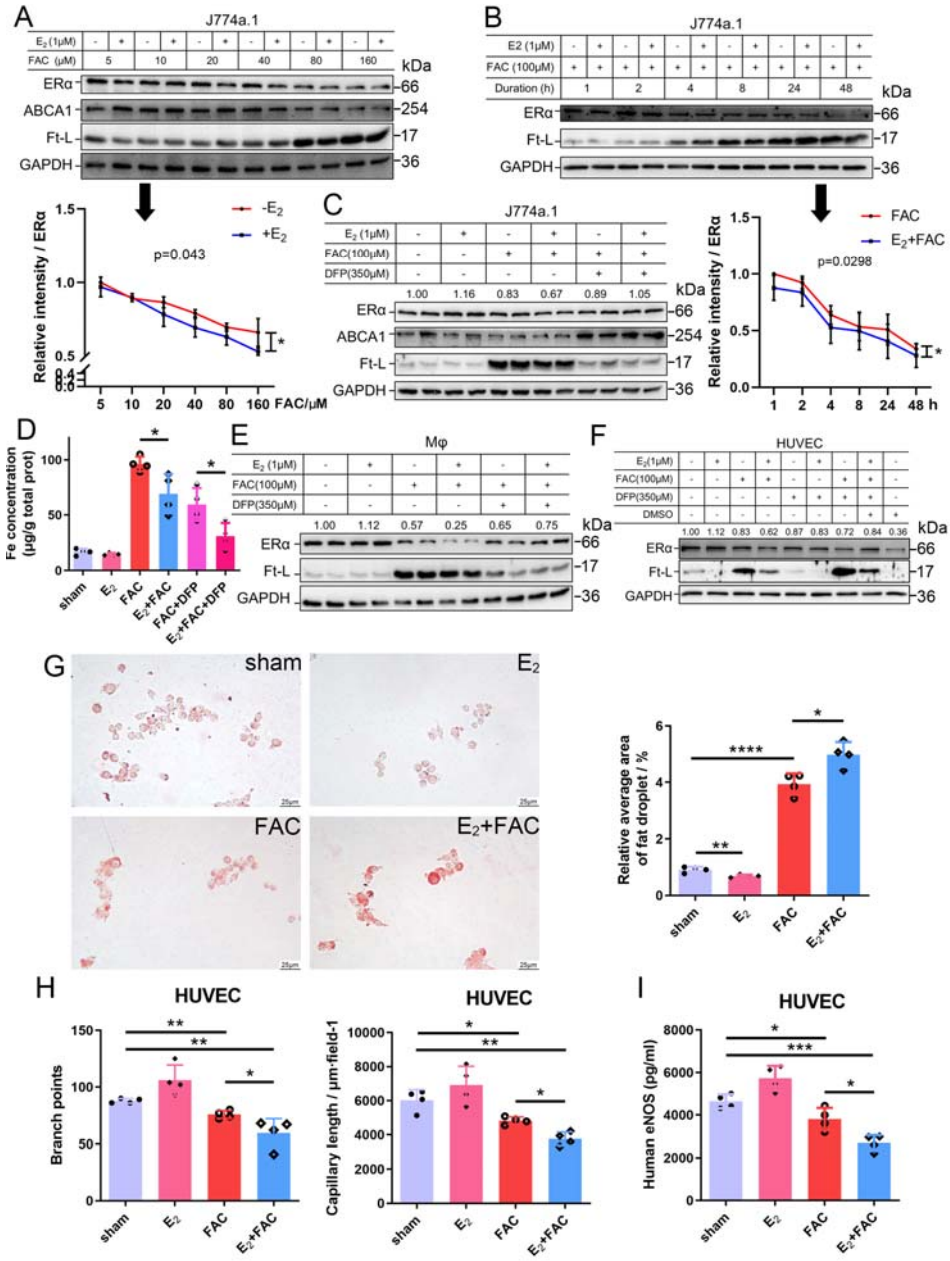

732

733

734

735

736

737

738

739

740

741 **Figure 5 The interactive effects of iron overload and E<sub>2</sub> treatment on ERα**  
742 **downregulation are mediated by the E3 ligase MDM2.** (A) Evaluation of ERα  
743 proteasome-dependent degradation in J774a.1 cells by western blotting. MG132: 10  
744 μM. n=4. (B) ERα turnover rate in J774a.1 cells under FAC or E<sub>2</sub>+FAC conditions,  
745 detected by western blotting after 20 μM cycloheximide (CHX) treatment. \**p* < 0.05  
746 using two-way ANOVA (C) Ubiquitination of ERα, evaluated by western blotting  
747 (anti-ubiquitin) following immunoprecipitation against ERα antibody. n = 3, \**p* <  
748 0.05. (D) Relative *Mdm2* mRNA expression in J774a.1 cells, assessed by qPCR, n =  
749 4, \*\**p* < 0.01. (E) The protein levels of ERα in the presence of FAC or FAC plus E<sub>2</sub> in  
750 J774a.1 cells after treatment of Nutlin-3, a specific antagonist of Mdm2. n=3. (F) The  
751 protein levels of ERα in the presence of FAC or FAC plus E<sub>2</sub> in HUVECs after  
752 treatment of Nutlin-3. n=3. (G) Mdm2 protein expression in the aortas of mice in the  
753 EPM or LPM stage, as detected by western blotting. n=3/group. (H) MDM2 protein  
754 levels in patient plaques, detected by western blotting and quantified with ImageJ.  
755 n=4/group, \*\*\**p* < 0.001. Student's *t*-test analysis was used for B, E, and H.  
756

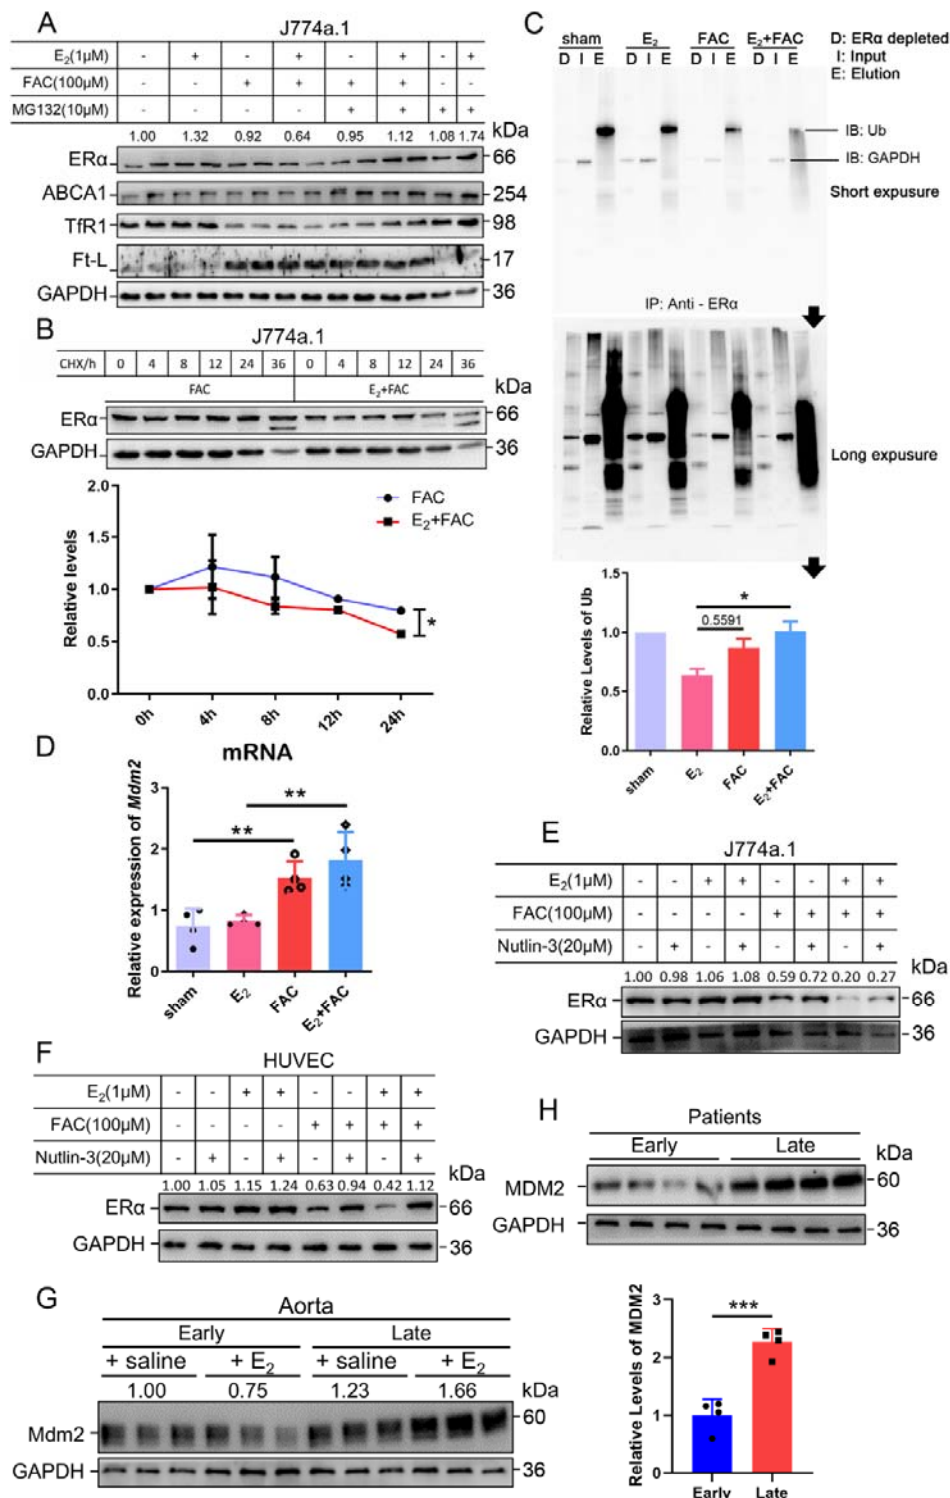

757

758

759

760

761

762 **Figure 6 Iron restriction therapy restored ER $\alpha$  levels and attenuated E<sub>2</sub>-**  
 763 **triggered progressive atherosclerosis in late postmenopausal mice.** (A) Flow  
 764 diagram of mouse modeling. The mice were ovariectomized at 8 weeks old and E<sub>2</sub> or  
 765 E<sub>2</sub>+DFP treated from 21 weeks old to 29 weeks old for 8 weeks. Saline is vehicle  
 766 control. Mice were fed high-fat chow one week after OVX. Thirteen weeks post-OVX  
 767 is considered as late post-menopause. (B) Oil red O-stained aortic lesions in *ApoE*<sup>-/-</sup>  
 768 mice treated with E<sub>2</sub> or E<sub>2</sub>+DFP as indicated. (C) The quantified lesion area of  
 769 atherosclerotic plaques in the aorta from B. n=4, \*\**p* < 0.01. (D) Serum total  
 770 cholesterol and total triglyceride levels. n=6, \**p* < 0.05, \*\* *p* < 0.01. (E) The iron  
 771 content in the aorta and liver, detected by ferrozine assays. n = 6, \*\**p* < 0.01, \**p* <  
 772 0.05. (F) Determination of serum iron in different groups. n = 6, \*\*\**p* < 0.001, \*\**p* <  
 773 0.01. (G) Protein expression in the aorta, detected by western blotting (left) and  
 774 quantified with ImageJ (right). \*\*\**p* < 0.001, \*\**p* < 0.01, \**p* < 0.05. The student's *t*-  
 775 test analysis was used for C - G.

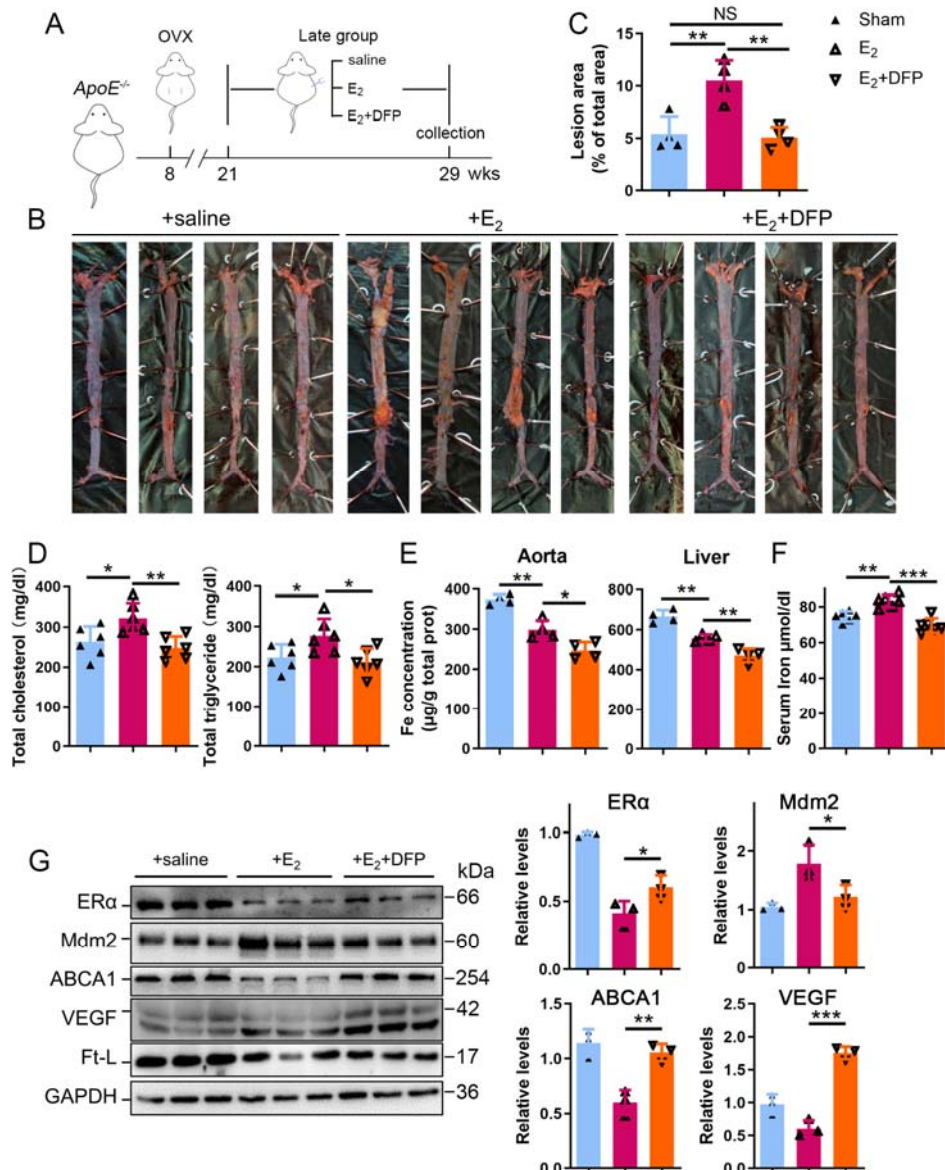



777 **Figure 7 Schematic model for the effects of postmenopausal iron accumulation**  
778 **with or without HRT on AS severity through modulating ER $\alpha$  expression.** Iron  
779 accumulation occurs naturally and gradually after menopause. In EPM, iron retention  
780 was mild, and ER $\alpha$  was responsive to HRT application to achieve protective effects  
781 (A). However, when iron overload is significant in LPM, Mdm2 is upregulated along  
782 with ER $\alpha$  downregulation (B). This negative correlation is potentiated by the  
783 application of HRT and iron accumulation with aging. Therefore, HRT use avails to  
784 aggravate the progression of AS in the LPM period. Iron chelation, however, reverses  
785 the adverse effect of HRT and attenuates the accelerated development of AS (A),  
786 suggesting a protective role of appropriate iron restriction in the LPM stage.

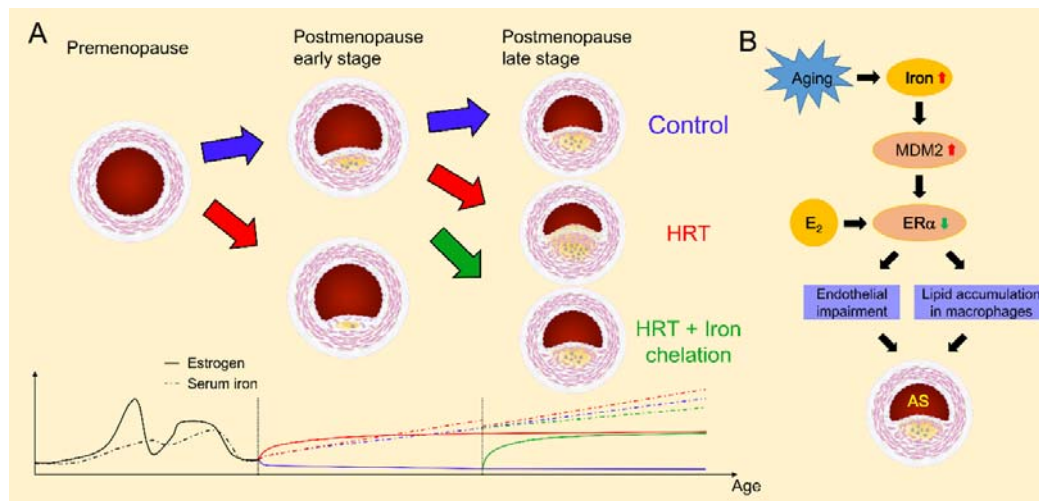

787

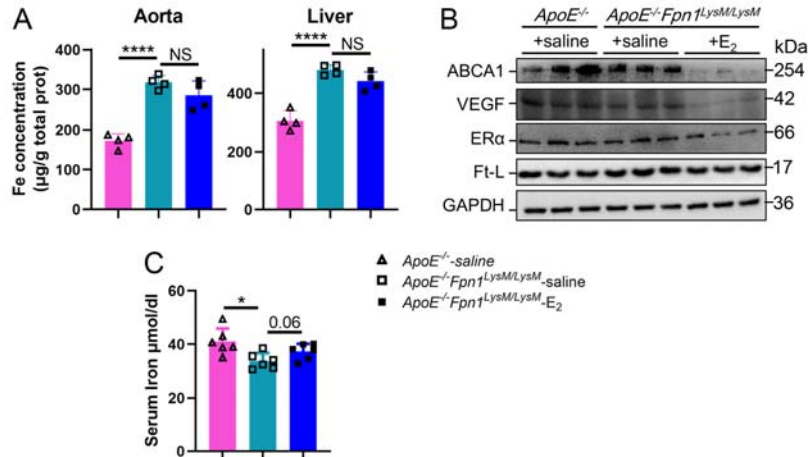

**Figure S1 E<sub>2</sub>-triggered ERα deficiency was observed in *ApoE*<sup>-/-</sup> *Fpn1*<sup>LysM/LysM</sup> at early post-menopause (25 weeks old).** (A) Iron content of aorta and liver detected by ferrozine assays. n = 4, \*\*\*\**p* < 0.0001. (B) ABCA-1, ERα, VEGF and Ft-L protein expression of aorta were detected. (F) Serum iron in different groups. n = 6, \**p* < 0.05.

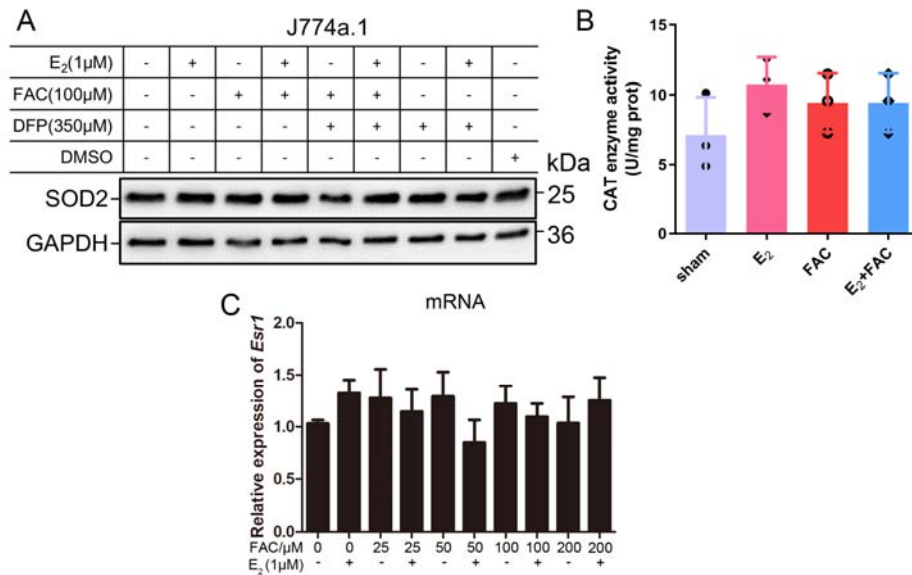

**Figure S2 No significant oxidative-stress was raised by application of E<sub>2</sub> and iron within the indicated concentration.** (A) SOD2 protein levels of J774a.1 post treatments with FAC/DFP in the presence/absence of E<sub>2</sub>. (B) The enzymatic activity of catalase in J774a.1. n=4. (C) Relative ERα mRNA expression of J774a.1 treated with different concentrations of FAC in the presence/absence of E<sub>2</sub>, assessed by qPCR. n = 5.

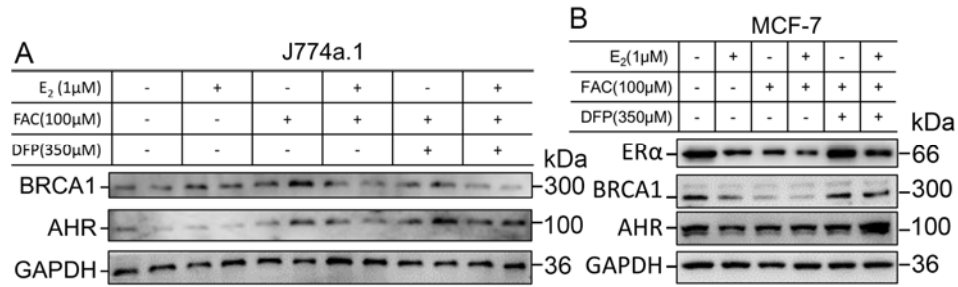

**Figure S3 E3-ligase responses to iron and E<sub>2</sub> treatment in different cell types. (A)**

BRCA1 and AHR protein expressions in J774a.1 were detected. (B) The protein

expression of ERα and its related E3 ligase, BRCA1 and AHR, was detected in

MCF-7 cell line. n=4
